# Supplementary material for: Combined Dietary Administration of Chlorella fusca and Ethanol-Inactivated Vibrio proteolyticus Modulates Intestinal Microbiota and Gene Expression in Chelon labrosus
Source: MDPI journal article supplement (doi:10.3390/ani13213325), 2023-10-26
Supplement: s1 [file s1]

**Table S1.** Ingredient and chemical composition of the experimental diets.

|                                                          | CT    | CVP   |
|----------------------------------------------------------|-------|-------|
| Ingredients (g kg <sup>-1</sup> dry weight, DW)          |       |       |
| Fish meal LT94 <sup>1</sup>                              | 75    | 64    |
| <i>Chlorella fusca</i> biomass <sup>2</sup>              | -     | 150   |
| Pea protein concentrate <sup>3</sup>                     | 75    | 64    |
| Soybean protein concentrate <sup>4</sup>                 | 175   | 149   |
| Soybean meal                                             | 188   | 159   |
| Sunflower meal                                           | 127   | 108   |
| Wheat gluten <sup>5</sup>                                | 60    | 51    |
| Wheat meal <sup>6</sup>                                  | 210   | 170   |
| Potato starch                                            | 25    | 25    |
| Fish oil                                                 | 40    | 35    |
| Vit and Min premix <sup>7</sup>                          | 10    | 10    |
| Binder                                                   | 15    | 15    |
| Chemical composition (g kg <sup>-1</sup> dry weight, DW) |       |       |
| Crude protein                                            | 394.2 | 381.7 |
| Crude lipid                                              | 79.1  | 72.6  |
| Ash                                                      | 130.3 | 142.1 |
| Nitrogen-free extracts <sup>8</sup>                      | 396.4 | 403.6 |

Dietary codes: CT, control diet; CVP, *C. fusca* + *V. proteolyticus* supplemented diet. <sup>1</sup> (Protein content, PC: 69.4%; lipid content, LC: 12.3%), Norsildemel (Bergen, Norway); <sup>2</sup> (PC: 15.2%; LC: 1.1%); <sup>3</sup> (PC: 85.5%; LC: 1.3%); <sup>4</sup> (PC: 51.5%; LC: 8.0%); <sup>5</sup> (PC: 76.0%; LC: 1.9%); <sup>6</sup> (PC: 12.0%; LC: 2.0%); <sup>7</sup> Vitamin and mineral premix: Vitamins (IU or mg kg<sup>-1</sup> premix): vitamin A (retinyl acetate), 2000,000 IU; vitamin D3 (DL-cholecalciferol), 200,000 IU; vitamin E, 10,000 mg; vitamin K3 (menadione sodium bisulfite), 2500 mg; vitamin B1 (thiamine hydrochloride), 3000 mg; vitamin B2 (riboflavin), 3000 mg; calcium pantothenate, 10,000 mg; nicotinic acid, 20,000 mg; vitamin B6 (pyridoxine hydrochloride), 2000 mg; vitamin B9 (folic acid), 1500 mg; vitamin B12 (cyanocobalamin), 10 mg; vitamin H (biotin), 300 mg; inositol, 50,000 mg; betaine, 50,000 mg; vitamin C (ascorbic acid), 50,000 mg. Minerals (mg kg<sup>-1</sup> premix): Co (cobalt carbonate), 65 mg; Cu (cupric sulfate), 900 mg; Fe (iron sulfate), 600 mg; I (potassium iodide), 50 mg; Mn (manganese oxide), 960 mg; Se (sodium selenite), 1 mg; Zn (zinc sulfate) 750 mg; Ca (calcium carbonate), 186,000 mg; KCl, 24,100 mg; NaCl 40,000 mg; excipient sepiolite, colloidal silica (Lifebioencapsulation SL, Almería Spain). <sup>8</sup> Calculated as: 100 – (% crude protein + % ether extract + % ash).
